# Supplementary material for: Alcohol intake in relation to non-fatal and fatal coronary heart disease and stroke: EPIC-CVD case-cohort study
Source: PubMed Central journal article supplement — BMJ. 2018 May 29;361:k934. doi: 10.1136/bmj.k934 (PMC5972779; doi:10.1136/bmj.k934), 2018-05-29

Supplementary Table 1. Sex-specific study characteristics<sup>1</sup> of the random sub-cohort from the EPIC-CVD study by categories of baseline alcohol intake and smoking status (n=16,244).

| <b>Men</b>                             | <b>Alcohol intake at baseline</b> |                |                |                | <b>Smoking status</b> |                |                |
|----------------------------------------|-----------------------------------|----------------|----------------|----------------|-----------------------|----------------|----------------|
|                                        | Non-drinkers                      | 0.1-29.9 g/day | 30-59.9 g/day  | ≥ 60 g/day     | Never                 | Former         | Current        |
| Characteristics (Unit of measure)      |                                   |                |                |                |                       |                |                |
| N                                      | 528                               | 4,081          | 1,206          | 481            | 1,992                 | 2,261          | 2,043          |
| Age at recruitment (years)             | 53 (40, 68)                       | 53 (37, 67)    | 53 (41, 64)    | 52 (41, 64)    | 52 (31, 66)           | 55 (41, 69)    | 51.5 (38, 65)  |
| Alcohol intake at baseline (g/day)     | -                                 | 11 (0.7, 27)   | 43 (31, 57)    | 81 (61, 130)   | 16 (0, 56)            | 22 (0, 68)     | 26 (0, 80)     |
| Alcohol non consumers at baseline (%)  | 100                               | -              | -              | -              | 9.8                   | 8.2            | 7.2            |
| Never smokers (%)                      | 37.1                              | 34.8           | 24.6           | 16.6           | 100                   | -              | -              |
| Former smokers (%)                     | 35.1                              | 35.7           | 37.7           | 34.1           | -                     | 100            | -              |
| Current smokers (%)                    | 27.8                              | 29.5           | 37.7           | 49.3           | -                     | -              | 100            |
| Body mass index (kg/m <sup>2</sup> )   | 27 (21, 34)                       | 27 (21, 33)    | 27 (22, 33)    | 28 (23, 34)    | 26 (21, 33)           | 27 (22, 34)    | 27 (21, 33)    |
| Height (cm)                            | 172 (159, 185)                    | 174 (162, 187) | 173 (161, 186) | 173 (162, 185) | 174 (161, 187)        | 174 (162, 186) | 173 (161, 186) |
| PA index moderately active (%)         | 22.4                              | 26.3           | 26.1           | 27.2           | 26.6                  | 25.2           | 26.2           |
| <b>Women</b>                           | <b>Alcohol intake at baseline</b> |                |                |                | <b>Smoking status</b> |                |                |
|                                        | Non-drinkers                      | 0.1-29.9 g/day | 30-59.9 g/day  | ≥ 60 g/day     | Never                 | Never          | Former         |
| Characteristics (Unit of measure)      |                                   |                |                |                |                       |                |                |
| N                                      | 2,401                             | 7,033          | 465            | 49             | 5,687                 | 1,989          | 2,272          |
| Age at recruitment (years)             | 52 (36, 67)                       | 52 (36, 67)    | 52 (378, 64)   | 52 (41, 63)    | 53 (37, 67)           | 52 (36, 67)    | 49 (35, 64)    |
| Alcohol intake at baseline (g/day)     | -                                 | 7 (0.3, 24)    | 42 (30, 70)    | 76 (61, 108)   | 6 (0, 24)             | 10 (0, 33)     | 10 (0, 37)     |
| Alcohol non consumers at baseline (%)  | 100                               | -              | -              | -              | 29.5                  | 14.3           | 19.4           |
| Never smokers (%)                      | 69.8                              | 54.6           | 34.2           | 20.4           | 100                   | -              | -              |
| Former smokers (%)                     | 11.8                              | 22.2           | 27.5           | 28.6           | -                     | 100            | -              |
| Current smokers (%)                    | 18.4                              | 23.2           | 38.3           | 51.0           | -                     | -              | 100            |
| Body mass index (kg/m <sup>2</sup> )   | 28 (21, 37)                       | 26 (20, 34)    | 25 (20, 32)    | 26 (21, 35)    | 27 (20, 36)           | 26 (20, 34)    | 25 (19, 33)    |
| Height (cm)                            | 158 (148, 170)                    | 162 (151, 173) | 164 (153, 175) | 164 (152, 173) | 160 (149, 172)        | 163 (152, 174) | 162 (151, 173) |
| PA index moderately active (%)         | 14.0                              | 21.5           | 23.7           | 18.4           | 17.9                  | 23.2           | 21.5           |
| Postmenopausal status <sup>2</sup> (%) | 55.0                              | 49.8           | 52.3           | 46.9           | 55.1                  | 49.4           | 42.8           |

<sup>1</sup>Continuous variables were reported by means and 5<sup>th</sup> and 95<sup>th</sup> percentiles. Physical activity was measured by the Cambridge physical activity index; <sup>2</sup>Comprehensive of women that underwent bilateral ovariectomy.

Supplementary Table 2. Frequencies of events, and hazard ratios (HR)<sup>1</sup> and 95% confidence intervals for non-fatal CHD and stroke by levels of **baseline alcohol consumption** (g/day), separately in current and never smokers.

| <b>Non-fatal CHD</b>            |               | <b>Never smokers</b> |               | <b>Current smokers</b> |  | <b>P<sub>Interaction</sub><sup>4</sup></b> |
|---------------------------------|---------------|----------------------|---------------|------------------------|--|--------------------------------------------|
|                                 | <b>Events</b> | <b>HR (95% CI)</b>   | <b>Events</b> | <b>HR (95% CI)</b>     |  |                                            |
| Non-drinkers                    | 757           | 1.20 (1.04, 1.38)    | 485           | 1.21 (0.99, 1.47)      |  |                                            |
| 0.1-4.9                         | 1,073         | 1 (ref.)             | 887           | 1 (ref.)               |  |                                            |
| 5-14.9                          | 668           | 0.84 (0.73, 0.97)    | 746           | 0.81 (0.69, 0.95)      |  |                                            |
| 15-29.9                         | 281           | 0.85 (0.71, 1.02)    | 545           | 0.77 (0.64, 0.91)      |  |                                            |
| 30-59.9                         | 190           | 0.88 (0.71, 1.10)    | 487           | 0.70 (0.58, 0.84)      |  |                                            |
| ≥ 60                            | 39            | 0.77 (0.51, 1.16)    | 218           | 0.68 (0.53, 0.87)      |  |                                            |
| p <sub>Wald</sub> <sup>2</sup>  |               | 0.106                |               | 9.0 E <sup>-04</sup>   |  | 0.464                                      |
| p <sub>trend</sub> <sup>3</sup> |               | 0.095                |               | 2.2 E <sup>-04</sup>   |  |                                            |
| <b>Non-fatal stroke</b>         |               | <b>Never smokers</b> |               | <b>Current smokers</b> |  | <b>P<sub>Interaction</sub><sup>4</sup></b> |
|                                 | <b>Events</b> | <b>HR (95% CI)</b>   | <b>Events</b> | <b>HR (95% CI)</b>     |  |                                            |
| Non-drinkers                    | 490           | 1.20 (1.02, 1.41)    | 243           | 1.33 (1.05, 1.69)      |  |                                            |
| 0.1-4.9                         | 690           | 1 (ref.)             | 491           | 1 (ref.)               |  |                                            |
| 5-14.9                          | 575           | 1.11 (0.95, 1.28)    | 481           | 1.01 (0.83, 1.21)      |  |                                            |
| 15-29.9                         | 234           | 1.15 (0.94, 1.41)    | 330           | 1.07 (0.87, 1.32)      |  |                                            |
| 30-59.9                         | 149           | 1.19 (0.94, 1.52)    | 314           | 1.07 (0.86, 1.33)      |  |                                            |
| ≥ 30                            | 49            | 2.07 (1.34, 3.21)    | 145           | 1.19 (0.89, 1.59)      |  |                                            |
| p <sub>Wald</sub> <sup>2</sup>  |               | 0.016                |               | 0.784                  |  | 0.019                                      |
| p <sub>trend</sub> <sup>3</sup> |               | 1.1 E <sup>-04</sup> |               | 0.100                  |  |                                            |

<sup>1</sup>Models were stratified by centre and sex, systematic adjustment was undertaken for age at recruitment, BMI, height, smoking status, history of hypertension. Models included interaction terms between baseline alcohol consumption and smoking indicators (0=never smokers, 1=current smokers). Moderate alcohol consumption (0.1-4.9 g/day) at baseline and never smokers were the reference category; <sup>2</sup>p<sub>Wald</sub> computed with a linear test for contrast with 4 degrees of freedom, not including the category of alcohol non-consumers (<0.1 g/day); <sup>3</sup>p<sub>trend</sub> associated to alcohol at baseline modelled as a linear variable, with the inclusion in the model of an indicator variable expressing alcohol consumption; <sup>4</sup>p<sub>Interaction</sub>: p-value for multiplicative interaction computed with a Wald test of the interaction term with 1 degree of freedom.

Supplementary Table 3. Frequencies of events, hazard ratios (HR)<sup>1</sup> and 95% confidence intervals by levels of **baseline alcohol consumption** (g/day) for heamorrhagic and ischaemic strokes.

|                                 | <b>Heamorrhagic stroke</b> |                   | <b>Ischaemic stroke</b> |                   |
|---------------------------------|----------------------------|-------------------|-------------------------|-------------------|
|                                 | Events                     | HR (95% CI)       | Events                  | HR (95% CI)       |
| Non-consumers                   | 146                        | 1.42 (1.12, 1.80) | 664                     | 1.28 (1.11, 1.47) |
| 0.1-4.9                         | 201                        | 1 (ref.)          | 1,102                   | 1 (ref.)          |
| 5-14.9                          | 208                        | 1.13 (0.91, 1.39) | 1,016                   | 1.04 (0.92, 1.17) |
| 15-29.9                         | 117                        | 1.15 (0.88, 1.49) | 597                     | 1.14 (0.99, 1.31) |
| 30-59.9                         | 102                        | 1.40 (1.06, 1.85) | 432                     | 1.17 (0.99, 1.37) |
| ≥ 60                            | 39                         | 1.78 (1.20, 2.69) | 161                     | 1.34 (1.06, 1.69) |
| p <sub>Wald</sub> <sup>2</sup>  |                            | 0.034             |                         | 0.079             |
| 12 g/day increase               |                            | 1.10 (1.04, 1.15) |                         | 1.05 (1.02, 1.09) |
| p <sub>trend</sub> <sup>3</sup> |                            | 0.001             |                         | 0.001             |

<sup>1</sup>Models were stratified by centre and systematic adjustment was undertaken for age at recruitment, BMI, height, smoking status, history of hypertension. Analyses were conducted among participants with available information on lifetime alcohol intake; <sup>2</sup>p<sub>Wald</sub> computed with a linear test for contrast with 4 degrees of freedom, not including the category of alcoholic subtype non-consumers (<0.1 g/day); <sup>3</sup>p<sub>trend</sub> associated to alcohol at baseline modelled as a linear variable, with inclusion in the model of an indicator variable expressing alcohol subtype consumption.

Supplementary Table 4. Sensitivity analyses: frequencies of events, hazard ratios (HR)<sup>1</sup> and 95% confidence intervals by levels of baseline alcohol consumption (g/day), after exclusions of the first 2-years of follow-up for non-fatal coronary heart disease (CHD) and non-fatal stroke, on non-fatal and overall myocardial infarction (MI), and non-fatal CHD by recruitment centers that completed (or not) assessment of incident angina during follow-up.

| Exclusion first 2 years | Non-fatal CHD |                   | Non-fatal stroke |                   |
|-------------------------|---------------|-------------------|------------------|-------------------|
|                         | Events        | HR (95% CI)       | Events           | HR (95% CI)       |
| <0.1                    | 1,425         | 1.13 (1.01, 1.26) | 912              | 1.27 (1.12, 1.43) |
| 0.1-4.9                 | 2,548         | 1 (ref.)          | 1,559            | 1 (ref.)          |
| 5-14.9                  | 2,008         | 0.82 (0.75, 0.90) | 1,498            | 1.06 (0.96, 1.18) |
| 15-29.9                 | 1,183         | 0.78 (0.70, 0.87) | 863              | 1.11 (0.98, 1.26) |
| 30-59.9                 | 905           | 0.72 (0.64, 0.82) | 700              | 1.12 (0.97, 1.29) |
| ≥ 60                    | 320           | 0.68 (0.57, 0.82) | 273              | 1.36 (1.11, 1.68) |
| pWald <sup>2</sup>      |               | 4.85 E-05         |                  | 0.052             |
| 12 g/day increase       |               | 0.94 (0.92, 0.96) |                  | 1.05 (1.02, 1.08) |
| Ptrend <sup>3</sup>     |               | 4.9 E-07          |                  | 0.001             |

  

|                     | Non-fatal MI |                   | Overall MI |                   |
|---------------------|--------------|-------------------|------------|-------------------|
|                     | Events       | HR (95% CI)       | Events     | HR (95% CI)       |
| <0.1                | 856          | 1.14 (1.01, 1.29) | 1,077      | 1.18 (1.05, 1.33) |
| 0.1-4.9             | 1,697        | 1 (ref.)          | 2,039      | 1 (ref.)          |
| 5-14.9              | 1,462        | 0.81 (0.73, 0.90) | 1,739      | 0.81 (0.73, 0.89) |
| 15-29.9             | 904          | 0.76 (0.67, 0.86) | 1,049      | 0.75 (0.66, 0.84) |
| 30-59.9             | 700          | 0.69 (0.60, 0.78) | 838        | 0.71 (0.62, 0.81) |
| ≥ 60                | 261          | 0.63 (0.52, 0.77) | 328        | 0.68 (0.57, 0.83) |
| pWald <sup>2</sup>  |              | 9.7 E-09          |            | 3.3 E-08          |
| 12 g/day increase   |              | 0.93 (0.91, 0.95) |            | 0.94 (0.92, 0.97) |
| Ptrend <sup>3</sup> |              | 8.3 E-08          |            | 4.9 E-06          |

  

| Non-fatal MI        | Centers with angina <sup>4</sup> |                   | Centers without angina <sup>4</sup> |                   |
|---------------------|----------------------------------|-------------------|-------------------------------------|-------------------|
|                     | Events                           | HR (95% CI)       | Events                              | HR (95% CI)       |
| <0.1                | 429                              | 1.22 (1.03, 1.46) | 427                                 | 1.09 (0.92, 1.29) |
| 0.1-4.9             | 469                              | 1 (ref.)          | 1,228                               | 1 (ref.)          |
| 5-14.9              | 345                              | 0.81 (0.68, 0.96) | 1,117                               | 0.81 (0.71, 0.91) |
| 15-29.9             | 214                              | 0.70 (0.57, 0.86) | 690                                 | 0.77 (0.67, 0.90) |
| 30-59.9             | 214                              | 0.74 (0.59, 0.92) | 486                                 | 0.66 (0.56, 0.78) |
| ≥ 60                | 95                               | 0.78 (0.58, 1.05) | 166                                 | 0.57 (0.44, 0.74) |
| pWald <sup>2</sup>  |                                  | 0.006             |                                     | 8.6 E-07          |
| 12 g/day increase   |                                  | 0.97 (0.93, 1.01) |                                     | 0.91 (0.88, 0.94) |
| Ptrend <sup>3</sup> |                                  | 0.100             |                                     | 1.4 E-07          |

  

|                     | Ischaemic stroke |                   | Hemorrhagic stroke |                   |
|---------------------|------------------|-------------------|--------------------|-------------------|
|                     | Events           | HR (95% CI)       | Events             | HR (95% CI)       |
| <0.1                | 664              | 1.28 (1.11, 1.47) | 146                | 1.42 (1.12, 1.80) |
| 0.1-4.9             | 1,102            | 1 (ref.)          | 201                | 1 (ref.)          |
| 5-14.9              | 1,016            | 1.04 (0.92, 1.17) | 208                | 1.13 (0.91, 1.39) |
| 15-29.9             | 597              | 1.14 (0.99, 1.31) | 117                | 1.15 (0.88, 1.49) |
| 30-59.9             | 432              | 1.17 (0.99, 1.37) | 102                | 1.40 (1.06, 1.85) |
| ≥ 60                | 161              | 1.34 (1.06, 1.70) | 39                 | 1.78 (1.20, 2.65) |
| pWald <sup>2</sup>  |                  | 0.079             |                    | 0.034             |
| 12 g/day increase   |                  | 1.05 (1.02, 1.09) |                    | 1.10 (1.04, 1.15) |
| Ptrend <sup>3</sup> |                  | 0.001             |                    | 3.4 E-04          |

<sup>1</sup>Models were stratified by centre and systematic adjustment was undertaken for age at recruitment, BMI, height, smoking status, history of hypertension; <sup>2</sup> $p_{\text{Wald}}$  computed with a linear test for contrast with 4 degrees of freedom, not including the category of alcohol non-consumers (<0.1 g/day); <sup>3</sup> $p_{\text{trend}}$  associated to alcohol at baseline modelled as a linear variable, with inclusion in the model of an indicator variable expressing alcohol consumption; <sup>4</sup>Incident angina events were assessed in Florence, Ragusa, Naples (Italy), Spain, UK, The Netherlands, Greece.

Supplementary Table 5. Validity of ascertainment for non-fatal and fatal coronary heart disease (CHD) and stroke events.

|          |             | Non-fatal CHD | Fatal CHD    | Non-fatal stroke | Fatal stroke |
|----------|-------------|---------------|--------------|------------------|--------------|
| Validity | Low         | 2,514 (27%)   | 126 (7%)     | 1,406 (24%)      | 383 (52%)    |
|          | Medium/High | 6,793 (73%)   | 1,573 (93%)  | 4,449 (76%)      | 350 (48%)    |
|          | Total       | 9,307 (100%)  | 1,699 (100%) | 5,855 (100%)     | 733 (100%)   |

Supplementary Figure 1. Country-specific random effects meta-analysis displaying HR for non-fatal and fatal coronary heart disease (CHD), fatal CHD, non-fatal and fatal stroke with respect to alcohol intake at baseline (for 12 g/day). For fatal CHD both a linear and a quadratic term were fitted, consistently with HR estimates in Table 2 and dose-response relationship in Figure 1.

(Please refer to file Supplementary Figure1.pdf)

# Alcohol consumption at baseline (g/day)

## Non-fatal CHD

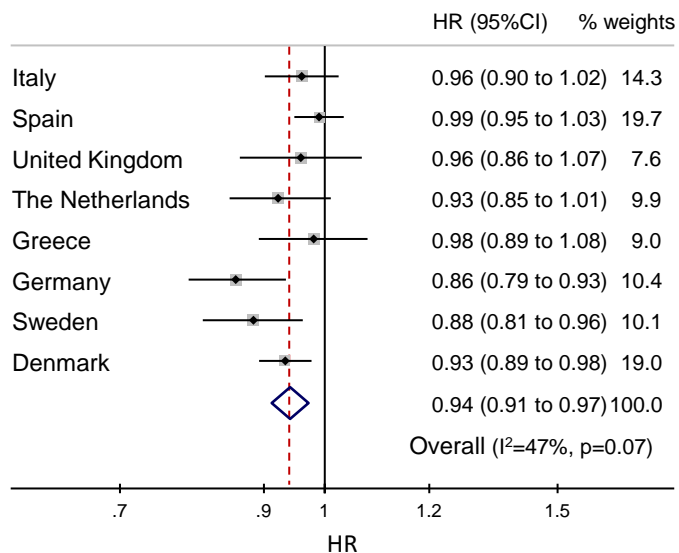

## Fatal CHD linear

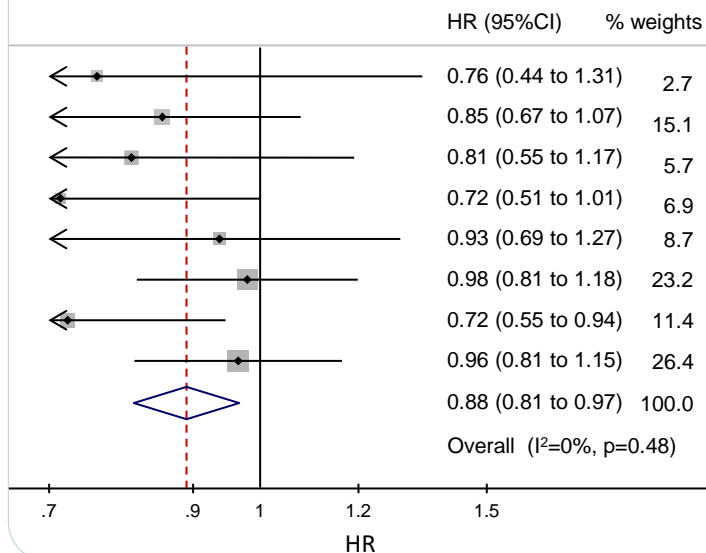

## Fatal CHD quadratic

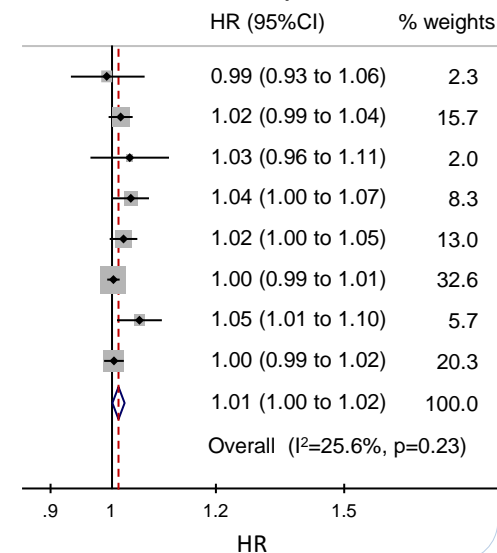

## Non-fatal stroke

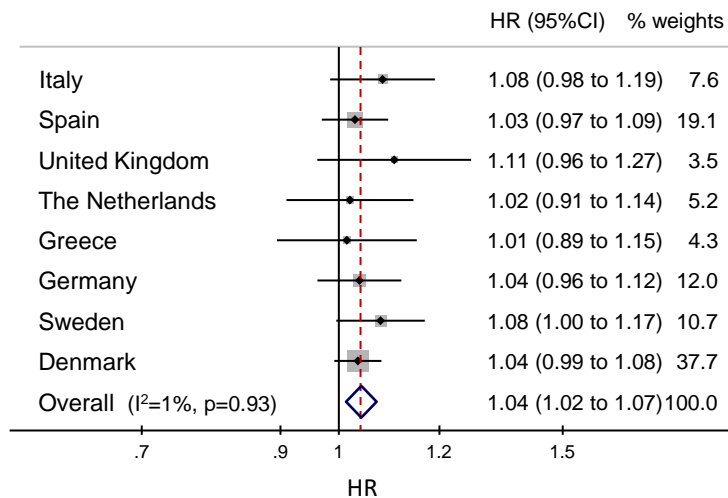

## Fatal stroke

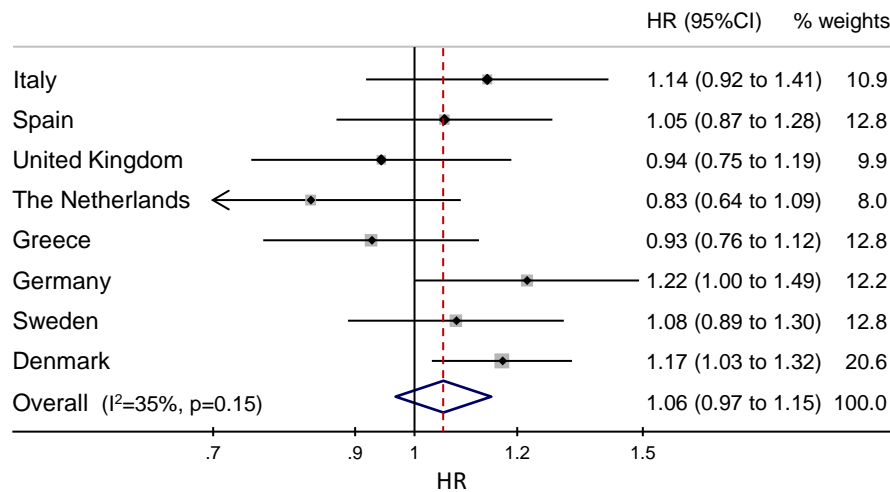

Supplement: ricc041441.ww1.pdf [file ricc041441.ww1.pdf]
